# Supplementary material for: Food-derived cyanidin-3-O-glucoside reverses microplastic toxicity via promoting discharge and modulating the gut microbiota in mice
Source: Royal Society of Chemistry journal article supplement (doi:10.1039/d1fo02983e), 2021-11-03
Supplement: d1fo02983e1.pdf [file d1fo02983e1.pdf]

Supporting Figures:

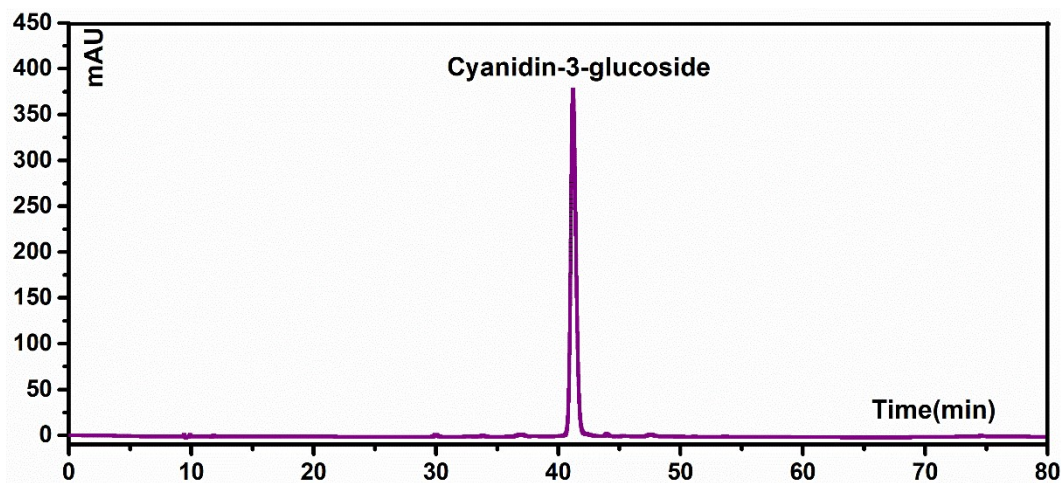

Figure. S1 UPLC elution profile, and cyanidin-3-glucoside (C3G) identified in anthocyanin extract.

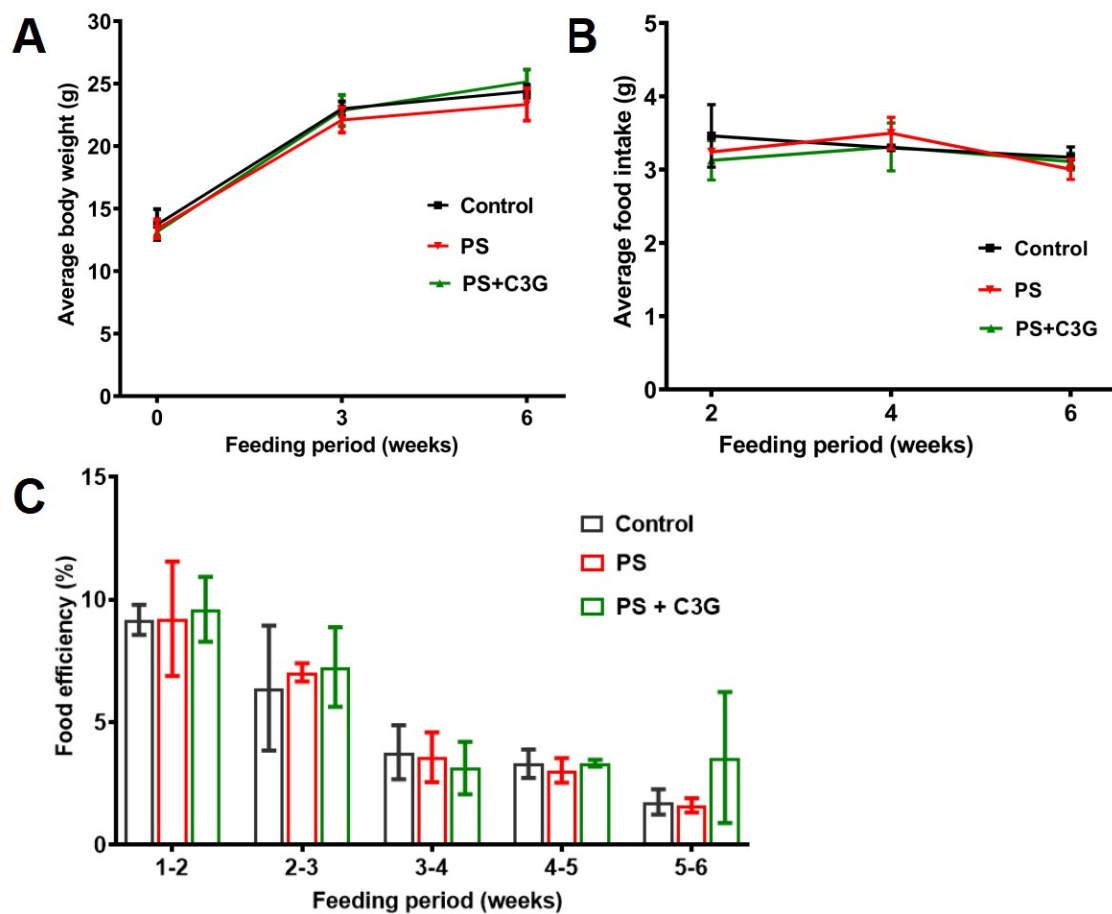

Figure. S2 Changes of basic parameters in C57BL/6 mice. (A) Average body weight of mice

at week 0, 3 and 6. (B) Average food intake per day of each mice at week 2, 4 and 6. 8 mice were included in each group. (C) Food efficiency of mice during each week, food efficiency = body weight gain (g)/food intake (g). Groups labeled with different letters like a, b, and c in the histogram represent statistically significant differences ( $p < 0.05$ ), and 8 mice were included in each group.

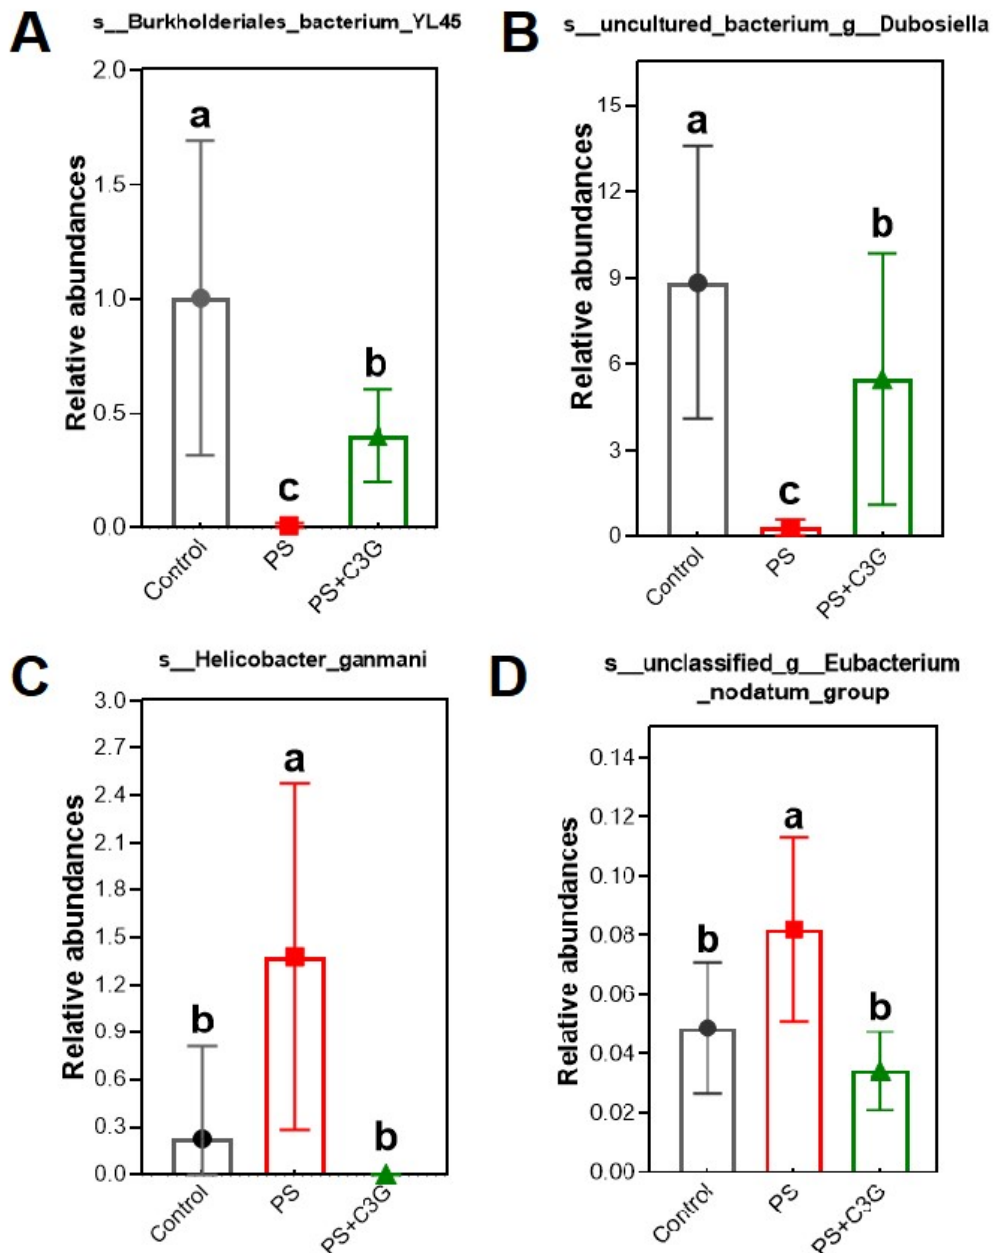

**Figure. S3 Some bacteria are of interest at species level.** Groups labeled with different letters like a, b, and c in the histogram represent statistically significant differences ( $p < 0.05$ ), and 8 mice were included in each group.
