# Supplementary material for: Food-derived cyanidin-3-O-glucoside reverses microplastic toxicity via promoting discharge and modulating the gut microbiota in mice
Source: Royal Society of Chemistry journal article supplement (doi:10.1039/d1fo02983e), 2021-11-03
Supplement: d1fo02983e2.pdf [file d1fo02983e2.pdf]

**Table. S1 Fold changes of selected bacteria at genus level.**

| OTU ID                             | Mean ± SD of Control | Mean ± SD of PS | Fold of PS / Control | Significance (Control, PS) | Mean ± SD of PS + C3G | Fold of PS / PS + C3G | Significance (PS, PS+C3G) |
|------------------------------------|----------------------|-----------------|----------------------|----------------------------|-----------------------|-----------------------|---------------------------|
| g__Alistipes                       | 0.03156±0.01631      | 0.00902±0.00325 | 0.2857               | $p < 0.05$                 | 0.01664±0.02117       | 1.8457                | $p > 0.05$                |
| g__Dubosiella                      | 0.08909±0.04760      | 0.00337±0.00300 | 0.0378               | $p < 0.05$                 | 0.05535±0.04369       | 16.4461               | $p < 0.05$                |
| g__Ileibacterium                   | 0.0000±0.00000       | 0.01728±0.03983 | ∞                    | $p < 0.05$                 | 0.0000±0.00000        | 0.0000                | $p < 0.05$                |
| g__Helicobacter                    | 0.00675±0.00875      | 0.01696±0.01072 | 2.5136               | $p < 0.05$                 | 0.00885±0.00712       | 0.5218                | $p > 0.05$                |
| g__Desulfovibrio                   | 0.01003±0.01274      | 0.01915±0.01428 | 1.9099               | $p > 0.05$                 | 0.00802±0.00525       | 0.4187                | $p < 0.05$                |
| g__norank_f__Oscillospiraceae      | 0.00685±0.00792      | 0.01384±0.01078 | 2.0207               | $p > 0.05$                 | 0.00943±0.00657       | 0.6811                | $p > 0.05$                |
| g__Lachnoclostridium               | 0.00269±0.00339      | 0.00646±0.00544 | 2.3996               | $p > 0.05$                 | 0.00508±0.00329       | 0.7870                | $p > 0.05$                |
| g__Lachnospiraceae_UCG-006         | 0.00085±0.00142      | 0.01382±0.01491 | 16.2644              | $p < 0.05$                 | 0.00133±0.00118       | 0.0960                | $p < 0.05$                |
| g__norank_f__Lachnospiraceae       | 0.00444±0.00618      | 0.01972±0.01135 | 4.4403               | $p < 0.05$                 | 0.01595±0.00968       | 0.8085                | $p > 0.05$                |
| g__unclassified_f__Lachnospiraceae | 0.01283±0.01273      | 0.03847±0.01891 | 2.9972               | $p < 0.05$                 | 0.03157±0.01960       | 0.8207                | $p > 0.05$                |
| g__Lachnospiraceae_NK4A136_group   | 0.01283±0.01411      | 0.08035±0.04519 | 6.2623               | $p < 0.05$                 | 0.06526±0.0555        | 0.8122                | $p > 0.05$                |
| g__Roseburia                       | 0.00297±0.00362      | 0.00953±0.00597 | 3.2105               | $p < 0.05$                 | 0.00598±0.00507       | 0.6278                | $p > 0.05$                |
| g__Marvinbryantia                  | 0.00122±0.00082      | 0.00090±0.00100 | 0.7398               | $p > 0.05$                 | 0.00243±0.00362       | 2.6905                | $p > 0.05$                |
| g__Prevotellaceae_NK3B31_group     | 0.02363±0.04095      | 0.00005±0.00001 | 0.0019               | $p > 0.05$                 | 0.00006±0.00016       | 1.2910                | $p > 0.05$                |
| g__Prevotellaceae_UCG-001          | 0.0000±0.0001        | 0.01755±0.03764 | 5995.2392            | $p > 0.05$                 | 0.00005±0.00009       | 0.0028                | $p > 0.05$                |
| g__Parasutterella                  | 0.0101±              | 0.0001±         | 0.0142               | $p < 0.05$                 | 0.00401±0.00204       | 28.0714               | $p < 0.05$                |
